# Supplementary material for: Giantin mediates Golgi localization of Gal3-O-sulfotransferases and affects salivary mucin sulfation in patients with Sjögren’s disease
Source: PubMed Central journal article supplement (PMC11601944; doi:10.1172/jci.insight.171585), 2024-11-22
Supplement: jciinsight-9-171585-s199.pdf [file jciinsight-9-171585-s199.pdf]

## Giantin mediates Golgi localization of Gal3-O-sulfotransferases and affects salivary mucin sulfation in Sjögren's disease patients

**Supplemental Video 1: Altered Gal3ST-4 localization in sh-Giantin cells.** Z-stack series of images showing Gal3ST-4 (green), GMAP120 (red), and nuclei (blue) in sh-Giantin cells fixed with cold acetone. Hoechst 33342 (blue) was used for nuclear staining.

<https://youtube.com/shorts/4ZzVqkWGdG0?feature=share>

**Supplemental Table 1. Demographic and serological characteristics of control subjects, patients with Sjögren's disease and patients with Sarcoidosis**

| Parameters                       | Control subjects | Patients with Sjögren's Disease | Patients with Sarcoidosis |
|----------------------------------|------------------|---------------------------------|---------------------------|
| N° of individuals                | 24               | 24                              | 5                         |
| Sex (female/male)                | 18/3             | 23/1                            | 3/2                       |
| Age, mean (range), years         | 40 (21-61)       | 40 (20-68)                      | 41 (26-62)                |
| Focus score†                     |                  |                                 |                           |
| 1                                | 0                | 7                               | 0                         |
| 2                                | 0                | 7                               | 0                         |
| ≥ 3                              | 0                | 10                              | 0                         |
| USWSF, mL/15 min mean (range)    | 3.4 (0.3-7.5)    | 1.4 (0-5.8)                     | 0.75 (0-1.8)              |
| Positive serology                |                  |                                 |                           |
| Anti Ro N° (%)                   | 0 (0 %)          | 22 (91.7 %)                     | 0 (0 %)                   |
| Anti La N° (%)                   | 0 (0 %)          | 16 (66.7 %)                     | 0 (0 %)                   |
| ANA N° (%)                       | 2 (0 %)          | 22 (91.7 %)                     | 3 (60 %)                  |
| Rheumatoid factor (RF) N° (%)    | 0 (0 %)          | 12 (50 %)                       | 1 (20 %)                  |
| ESSDAI, mean-median; IQR [25-75] | -                | 9.9-8 [5-17]                    | -                         |

Patients with Sarcoidosis consulted the physician because of oral and/or ocular dryness symptoms and underwent salivary gland biopsy for suspected Sjögren's disease. The clinical diagnosis did not meet Sjögren's classification criteria and was sarcoidosis instead. All of them had a biopsy with non-caseating granulomas compatible with Sarcoidosis.

USWSF: Unstimulated whole salivary flow, N°: number, %: percentage, ESSDAI: EULAR Sjögren syndrome disease activity index; EULAR, European League against Rheumatism. †Number of foci/4 mm<sup>2</sup> of tissue. ANA: antinuclear antibodies. IQR, interquartile range.

**Supplemental Table 2. sgRNA and shRNA sequences used to establish knockdown and knockout cell lines**

| <b>CRISPR-Cas9 sgRNA non-targeting control</b> |                                                                                                                                                      |
|------------------------------------------------|------------------------------------------------------------------------------------------------------------------------------------------------------|
| Sense:                                         | CACCGTAGGCGCGCCGCTCTCTAC                                                                                                                             |
| Antisense:                                     | AAACGTAGAGAGCGGCGCGCCTAC                                                                                                                             |
| <b>CRISPR-Cas9 sgRNA GOLGB1 Exon 8</b>         |                                                                                                                                                      |
| Sense:                                         | CACCGAACACGAAGAATCCTTGGT                                                                                                                             |
| Antisense:                                     | AAACACCAAGGATTCTTCGTGTTT                                                                                                                             |
| <b>GOLGB1 exon 8 primers for sequencing</b>    |                                                                                                                                                      |
| Sense:                                         | GGAGACTCTTCGTTGCTGCT                                                                                                                                 |
| Antisense:                                     | TGACATTCTAGATAAACTAGGACCC                                                                                                                            |
| <b>Giantin shRNAs plasmids (h)</b>             |                                                                                                                                                      |
| 60685-<br>SHA                                  | Hairpin sequence:<br>GATCCGAAGAACTCTCCAGAGTTATTCAAGAGATAACTCTGGAGAGTTCTTCTTTTT<br>Sense: GAAGAACUCUCCAGAGUUAtt      Antisense: UACUCUGGAGAGUUUCUUCtt |
| 60685-<br>SHB                                  | Hairpin sequence:<br>GATCCGCAAGAGGCTGATATTCAATTCAAGAGATTGAATATCAGCCTCTTGCTTTTT<br>Sense: GCAAGAGGCUGAUUUUCAAtt      Antisense: UUGAAUAUCAGCCUCUUGCtt |
| 60685-<br>SHC                                  | Hairpin sequence:<br>GATCCGAAGGTAGGTGAAATTGAATTCAAGAGATTCAATTTACCTACCTTCTTTTT<br>Sense: GAAGGUAGGUGAAAUUGAAtt      Antisense: UUCAUUUCACCUACCUUCtt   |
| <b>GM130 shRNA plasmids (h)</b>                |                                                                                                                                                      |
| 41224-<br>SHA                                  | Hairpin sequence:<br>GATCCCCAGCTATGTAACAAACAATTCAAGAGATTGTTTGTACATAGCTGGTTTTT<br>Sense: CCAGCUAUGUAACAAACAAtt      Antisense: UUGUUUGUUACAUAGCUGGtt  |
| 41224-<br>SHB                                  | Hairpin sequence:<br>GATCCGGAGTCGGTTAGACAACCTATTCAAGAGATAGTTGTCTAACCGACTCCTTTTT<br>Sense: GGAGUCGGUUAGACAACUAtt      Antisense: UAGUUGUCUAACCGACUCtt |
| 41224-<br>SHC                                  | Hairpin sequence:<br>GATCCGAAGATCACTGTCATCTAATTCAAGAGATTAGATGACAGTGATCTTCTTTTT<br>Sense: GAAGAUACUGUCAUCAAtt      Antisense: UUAGAUGACAGUGAUCUUCtt   |

All sequences are provided in 5' → 3' orientation

sgRNA: single guide RNA

shRNA: short-hairpin RNA

**Supplemental Table 3. Primers used for RT-qPCR assays**

| Gene<br>(encoded protein)   | Accession number | Primer sequences               |
|-----------------------------|------------------|--------------------------------|
| <b>GOLGB1</b><br>(Giantin)  | NM_001366282.2   | F: 5'-GCAGGAAGCTGAGCAAGAAA-3'  |
|                             | NM_001366283.2   | R: 5'-TTCCTTCATGCTGGCATTGG     |
|                             | NM_001256486.2   |                                |
|                             | NM_004487.5      |                                |
|                             | NM_001366284.2   |                                |
|                             | NM_001256487.2   |                                |
| <b>GOLGA2</b><br>(GM130)    | NM_001366244.1   | F: 5'- AACATCGCTGCATCCAGCTT-3' |
|                             | NM_001366246.1   | R: 5'- AATCTGCCATGCCACTCGTT-3' |
|                             | NM_004486.5      |                                |
| <b>USO1</b><br>(P115)       | NM_001290049.1   | F: 5'-AGGCTGCCAAGTAAACCAAG-3'  |
|                             |                  | R: 5'-CTGGCCAGCTGAAACTGAAT-3'  |
| <b>ACBD3</b><br>(GCP60)     | NM_022735.4      | F: 5'-CACACTGACAGCTCCGAAAA-3'  |
|                             |                  | R: 5'-GCCCACTGTAATCACGGAAT-3'  |
| <b>TFE3</b><br>(TFE3)       | NM_001282142.2   | F: 5'-AACAGCCCAGCACAGGTATT-3'  |
|                             | NM_006521.6      | R: 5'-AAGAGCAAGTTGGCTCAGA-3'   |
| <b>CREB3</b><br>(CREB3)     | NM_006368.5      | F: 5'-AACTCCAGGCCATGGTGATT-3'  |
|                             |                  | R: 5'- GCTGTCTTTCGGCACTTCTG-3' |
| <b>GalNT1</b><br>(GalNT1)   | NM_001384438.1   | F: 5'-TGGCCCAGTTACAATGCTCA-3'  |
|                             | NM_001384439.1   | R: 5'-ACCGACTTCCATTGCAGTCT-3'  |
|                             | NM_001384440.1   |                                |
|                             | NM_001384441.1   |                                |
|                             | NM_001384442.1   |                                |
|                             | NM_001384443.1   |                                |
|                             | NM_001384444.1   |                                |
|                             | NM_001384445.1   |                                |
|                             | NM_001384446.1   |                                |
| NM_020474.4                 |                  |                                |
| <b>C1GalT1</b><br>(C1GalT1) | NM_020156.5      | F: 5'-TCACACTTGCCCAAGGATGTT-3' |
|                             |                  | R: 5'-ACAAGTTCACAGGTGACGTT-3'  |
| <b>GCNT1</b><br>(GCNT1)     | NM_001097633.2   | 5'-TGTCACCTGGAATCAGCACT-3'     |
|                             | NM_001097634.1   | 5'-CAGCAACGTCCTCAGCATTT-3'     |
|                             | NM_001097635.2   |                                |
|                             | NM_001097636.2   |                                |
|                             | NM_001490.5      |                                |
| <b>h18S</b>                 | NM_022551.2      | F: 5'-GATATGCTCATGTGGTGTTG-3'  |
|                             |                  | R: 5'-AATCTTCTTCAGTCGCTCCA-3'  |

F: forward; R: reverse

**Supplemental Table 4.** Antibodies used for Western blot and immunofluorescence

| Primary antibodies                                 | Host species | Immunogen                                            | Source                       | Incubation dilution, time, T°                                         |
|----------------------------------------------------|--------------|------------------------------------------------------|------------------------------|-----------------------------------------------------------------------|
| Anti-Giantin, polyclonal (PRB-114C), IgG1          | rabbit       | 1-469 aa at the N-terminus of Giantin                | BioLegend                    | WB: 1:5000, 20 h, 4°C<br>IF: 1:5000, 20 h, 4°C<br>IP: 1 µL, 15 h, 4°C |
| Anti-Giantin monoclonal, (ab37266), IgG1           | mouse        | Rat Giantin                                          | Abcam                        | IF: 1:100, 20 h, 4°C                                                  |
| Anti-GM130, monoclonal (610822), IgG1              | mouse        | 869-982 aa of rat GM130                              | BD Bioscience                | WB: 1:1000, 20 h, 4°C<br>IF: 1:50, 20 h, 4°C<br>IP: 2 µL, 15 h, 4°C   |
| Anti-GMAP210, monoclonal, (611712), IgG1           | mouse        | 159-365 aa of human GMAP210                          | BD Transduction Laboratories | WB: 1:1000, 20 h, 4°C<br>IF: 1:50, 20 h, 4°C                          |
| Anti-PDIA1, monoclonal (1D3), IgG1                 | mouse        | Peptide mapped at the end C-terminus of rat PDIA1    | Enzo Life Sciences           | IF: 1:300, 20 h, 4°C                                                  |
| Anti-TGN46, polyclonal (AHP500), IgG1              | sheep        | Recombinant human TGN46                              | AbDSerotec                   | IF: 1:250, 20 h, 4°C                                                  |
| Anti-PAPST1, polyclonal, IgG                       | rabbit       | KAVPTEPPVQKV sequence of mouse PAPST1                | Dr. Shoko Nishihara          | IF: 1:500, 20 h, 4°C                                                  |
| Anti-GOLPH3, polyclonal (ab98023), IgG             | rabbit       | 1-100 aa of human GOLPH3                             | Abcam                        | IF: 1:50, 20 h, 4°C                                                   |
| Anti-MUC1, monoclonal (M8), IgG1                   | mouse        | DTR epitope of MUC1 VNTR                             | Dr. Dallas Swallow           | IF: 1:50, 20 h, 4°C                                                   |
| Anti-MUC7, monoclonal (PANH3), IgG1                | mouse        | CRPKLPPSPNKP PKFPNPHQP sequence of MUC7 N-terminus   | Dr. Ulla Mandel              | IF: 1:50, 20 h, 4°C                                                   |
| Anti-Gal3ST2, polyclonal (orb183825), IgG          | rabbit       | KLH-conjugated peptide (33178 aa) of human Gal3ST2   | Biorbyt                      | IF: 1:50, 20 h, 4°C                                                   |
| Anti-Gal3ST2, (H00079690-B01), IgG, polyclonal     | rabbit       | KLH-conjugated CELGPRRLRGEV ERL peptide              | GenScript                    | WB: 1:1000, 20 h, 4°C<br>IP: 1 µL, 15 h, 4°C                          |
| Anti-Gal3ST4, polyclonal                           | rabbit       | KLH-conjugated peptide (411-476 aa) of human Gal3ST4 | Biorbyt                      | WB: 1:1000, 20 h, 4°C<br>IF: 1:25, 20 h, 4°C<br>IP: 4 µL, 15 h, 4°C   |
| Anti-GalNAcT1, monoclonal (4D8), IgG1              | mouse        | 41-559 aa of GalNAcT1                                | Dr. Ulla Mandel              | WB: 1:10, 20 h, 4°C                                                   |
| Anti-Core2 GlcNAc-T2, polyclonal (ab227972), IgG   | rabbit       | Recombinant fragment of Core2 GlcNAc-T2              | Abcam                        | IP: 2 µL, 15 h, 4°C                                                   |
| Anti-Integrin α6, monoclonal (BQ16), IgG, sc-13542 | mouse        | Human Integrin α6                                    | Santa Cruz Biotechnology     | IP: 1 µL, 15 h, 4°C                                                   |

|                                                |        |                                                |                     |                             |
|------------------------------------------------|--------|------------------------------------------------|---------------------|-----------------------------|
| Anti-MUC5B, monoclonal (clone PANH2), IgG1     | mouse  | Partially deglycosylated MUC5B                 | Dra. Ulla Mandel    | IHQ: non-diluted, 20 h, 4°C |
| Anti-MUC5B, monoclonal (EU-MUC5Bb), IgG1       | mouse  | RNREQVGKFKM C sequence on CYS domains of MUC5B | Dra. Dallas Swallow | IHQ: 1:250, 20 h, 4°C       |
| Anti-sulfo-Lewis a and c, monoclonal (F2), IgM | mouse  | sulfo-Lewis a and c                            | Dr. Enno Veerman    | IHQ: 1:50, 20 h, 4°C        |
| Anti-GRP78 (BiP), polyclonal (ab21685), IgG    | rabbit | proprietary information                        | Abcam               | IF: 1:250, 20 h, 4°C        |
| Anti-β-actin, monoclonal (clone C4)            | mouse  | Actin of chicken gizzard                       | MP Biomedicals      | WB: 1:15.000, 1 h, RT       |

| Secondary antibodies                                 | Host species | Source                                                                  | Dilution        |
|------------------------------------------------------|--------------|-------------------------------------------------------------------------|-----------------|
| Anti-Rabbit IgG (H+L) Cross-Adsorbed, HRP conjugated | goat         | Pierce® by Thermo Scientific, 31462                                     | WB: 1:10.000    |
| Anti-Mouse IgG (H+L) Cross-Adsorbed, HRP conjugated  | goat         | Pierce® by Thermo Scientific, 31432                                     | WB: 1:10.000    |
| Anti-Rabbit IgG (H+L) Alexa Fluor®488/546 conjugated | goat         | Invitrogen by Thermo Fisher Scientific, A-11008 (488) and A-11010 (546) | IF: 1:200-1:100 |
| Anti-Mouse IgG (H+L) Alexa Fluor® 488/546 conjugated | goat         | Invitrogen by Thermo Fisher Scientific, A-11001 (488) and A 11003 (546) | IF: 1:200-1:100 |
| Anti-Mouse/Rabbit IgG Biotinylated                   | horse        | Vector Laboratories Vectastain Elite ABC Universal Plus Kit PK-8200     | IHQ: R.T.U.     |

aa: aminoacids; KLH: keyhole limpet hemocyanin; HRP: horseradish peroxidase, RT: room temperature, R.T.U: ready to use

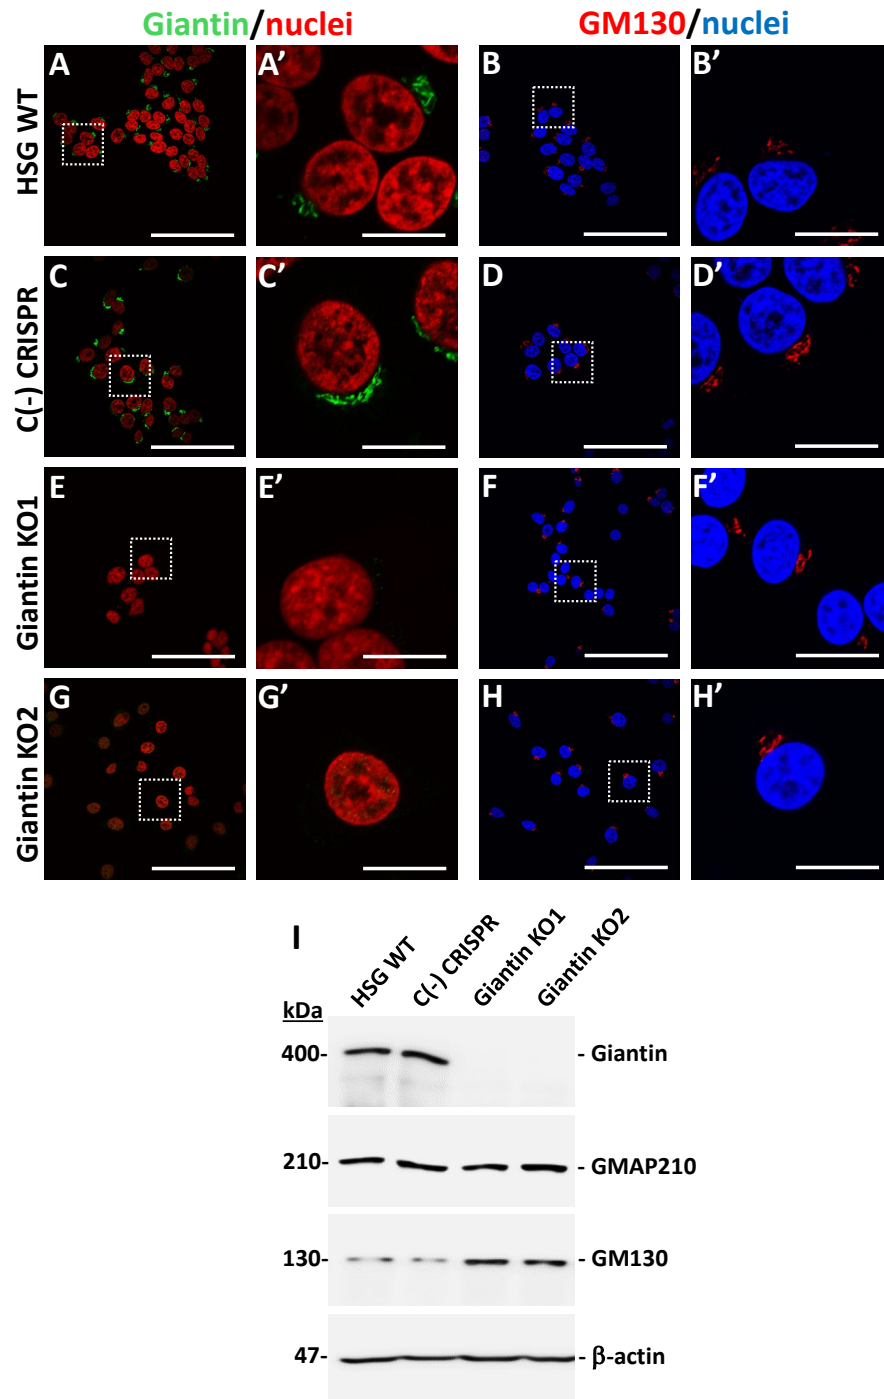

**Supplemental Figure S1. Establishment of CRISPR/Cas9 Giantin Knockout (KO) cell lines.** Representative micrographs of wild-type (WT) HSG cells (A-B), negative control (C(-)) CRISPR/Cas9 HSG cells (C-D), and two different cell lines of CRISPR/Cas9 Giantin KO cells (E-H). A, C, E, and G show Giantin (green) and nuclei (red). A', C', E', and G' are higher magnifications of regions surrounded by dashed lines in A, C, E, and G. B, D, F, and H show GM130 (red) and nuclei (blue). B', D', F', and H' are higher magnifications of regions surrounded by dashed lines in B, D, F, and H. Hoechst 33342 (blue) was used for nuclear staining. Bars: 10  $\mu$ m. I, Representative WB of Giantin, GMAP210, and GM130 in WT HSG cells, C(-) CRISPR/Cas9 HSG cells, and two different cell lines of CRISPR/Cas9 Giantin KO cells.  $\beta$ -actin was used as a loading control.

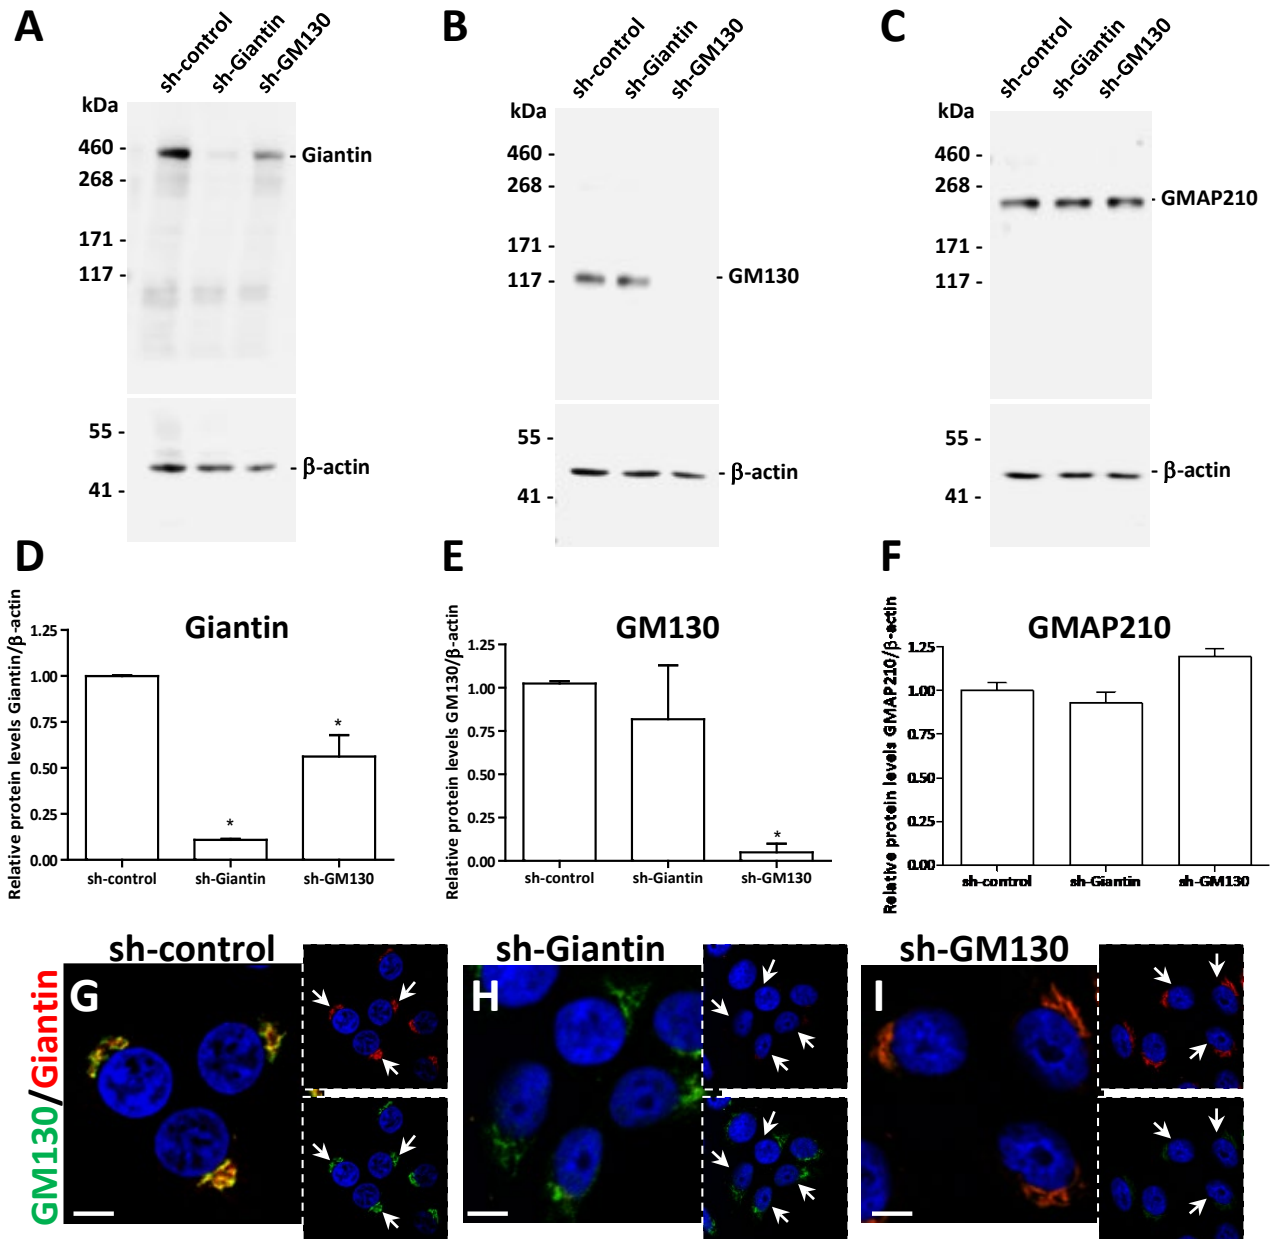

**Supplemental Figure S2. Establishment of Giantin or GM130 knockdown cells.** A-F, Representative WB of Giantin (A), GM130 (B), and GMAP210 (C) in sh-control, sh-Giantin, and sh-GM130 cells.  $\beta$ -actin was used as a loading control. G-I, Representative images of Giantin (green) and GM130 (red) detection by immunofluorescence in sh-control (G), sh-Giantin (H), and sh-GM130 (I) cells. Bars: 10  $\mu$ m. (\*) p values  $\leq 0.05$  were considered significant.

## HSG WT

GMAP210/Gal3ST4/nuclei

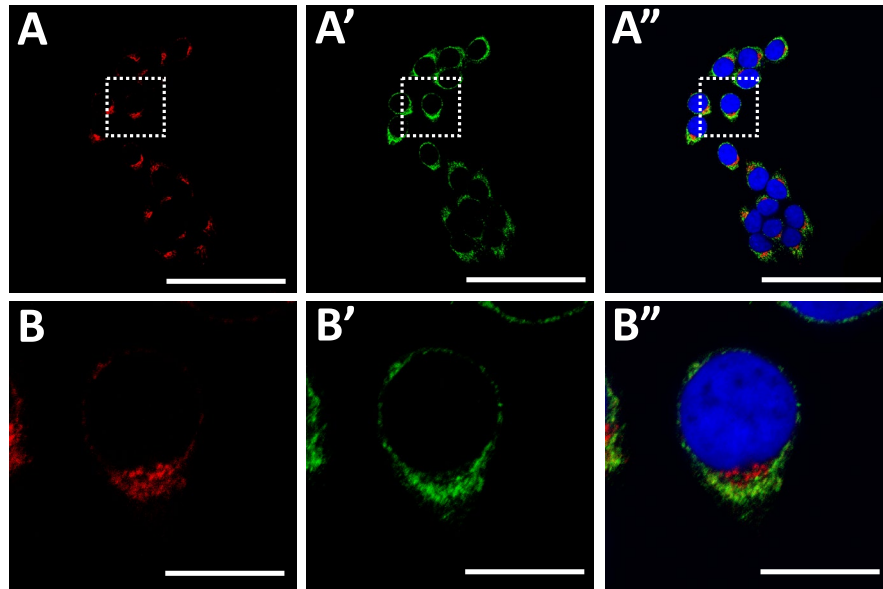

## C(-) CRISPR

GMAP210/Gal3ST4/nuclei

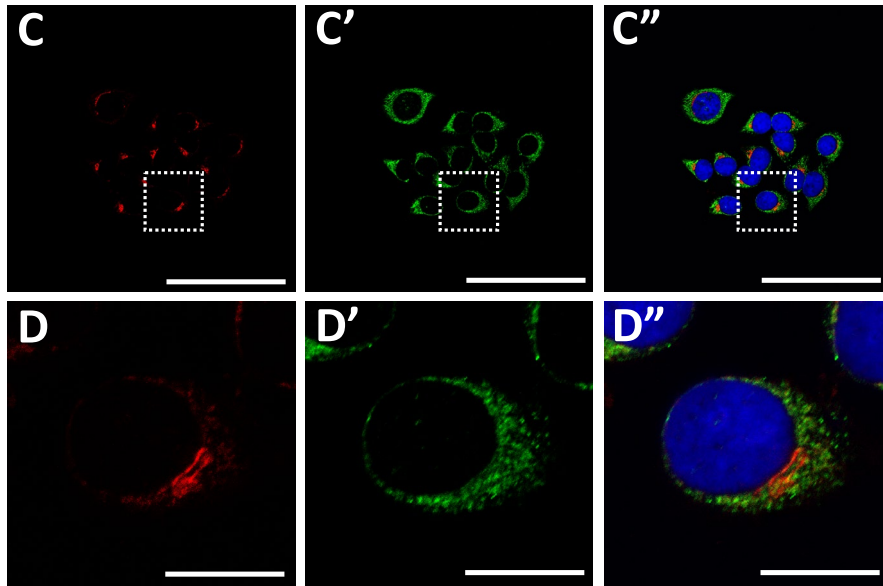

**Supplemental Figure S3. Localization of Gal3ST-4 in HSG cells expressing Giantin.** Representative micrographs of the double staining of Gal3ST-4 (green) and GMAP210 (red) in wild-type (WT) HSG cells (A-B) and negative control (C-) CRISPR/Cas9 HSG cells (C-D), B and D are higher magnifications of the regions enclosed by white dashed lines in A and C. Hoechst 33342 (blue) was used for nuclear staining. Bars A and C: 50  $\mu\text{m}$ ; B and F: 10  $\mu\text{m}$ .



## Giantin KO 1

GMAP210/Gal3ST4/nuclei

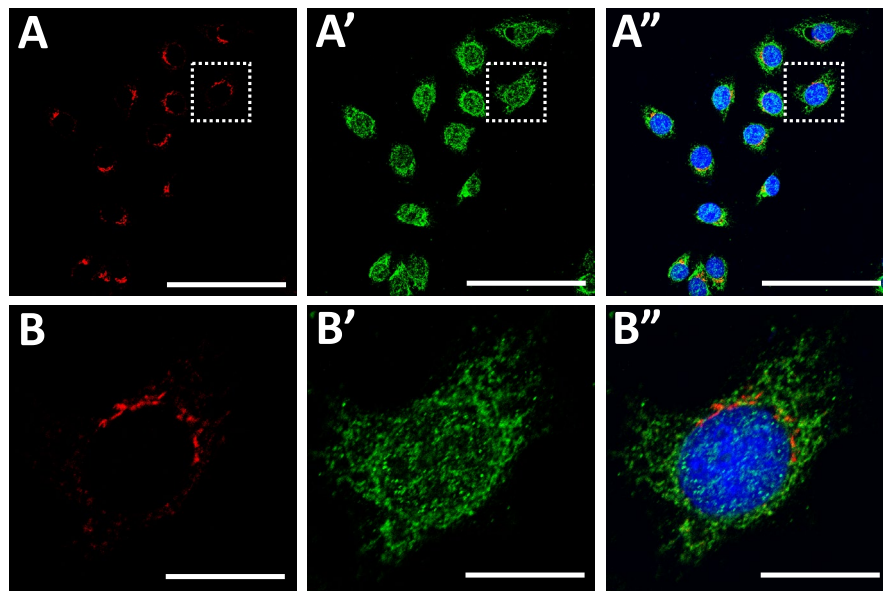

## Giantin KO 2

GMAP210/Gal3ST4/nuclei

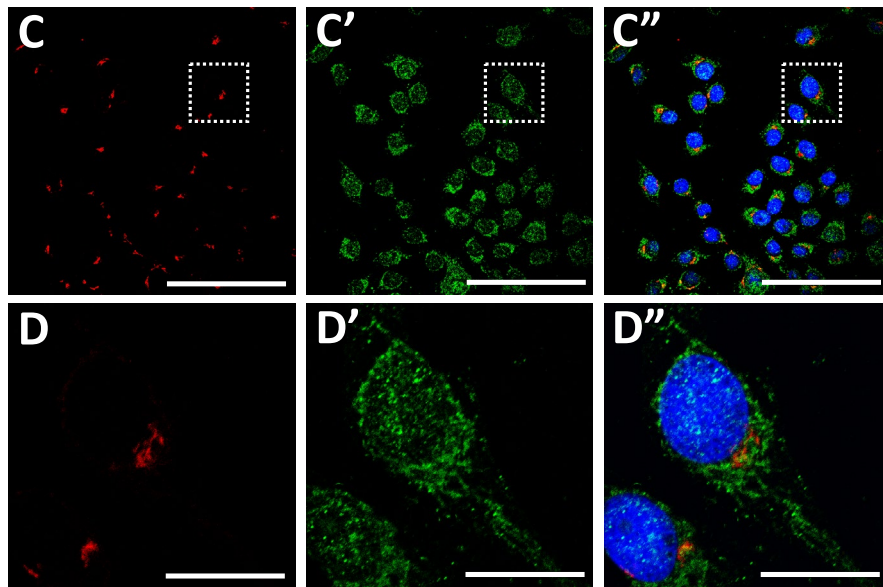

**Supplemental Figure S4. Altered localization of Gal3ST-4 in CRISPR/Cas9 Giantin knockout (KO) cells.** Representative micrographs of the double staining of Gal3ST-4 (green) and GMAP210 (red) in two cell lines: KO 1 (A-B) and KO 2 (C-D) of CRISPR/Cas9 Giantin KO cells. B and D are higher magnifications of the regions enclosed by white dashed lines in A and C. Hoechst 33342 (blue) was used for nuclear staining. Bars A and C: 50  $\mu$ m; B and F: 10  $\mu$ m.

## Gal3ST-2/nuclei

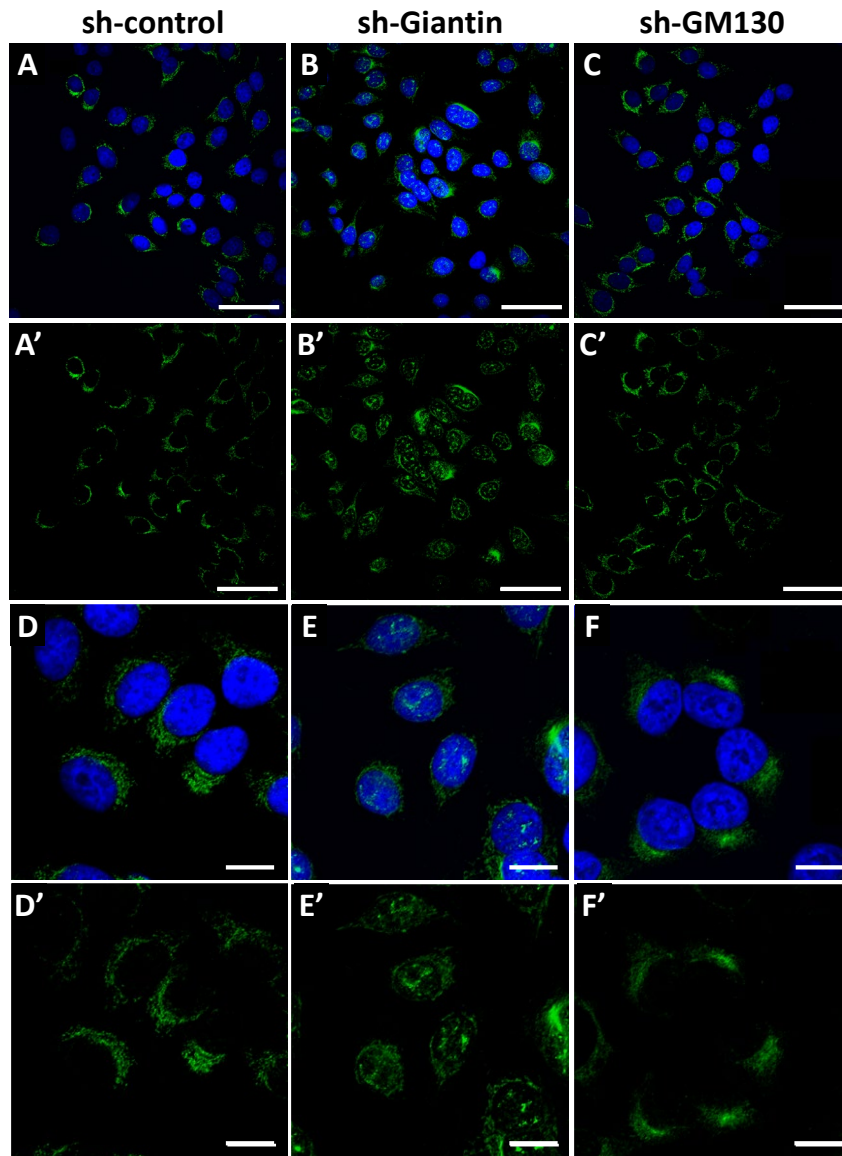

**Supplemental Figure S5. Altered Gal3ST-2 localization in sh-Giantin cells.** Representative micrographs of Gal3ST-2 (green) staining and nuclei (blue) in HSG cells. **A**, In most sh-control cells, Gal3ST-2 is located adjacent to the nucleus in a “crescent moon shaped” distribution; in a smaller percentage of cells, it is also located in close proximity to the nucleus, although showing a ring-shaped distribution. **B**, In sh-Giantin cells, this adjacent location is maintained, although a mark is also apparently observed “on the nucleus.” **C**, the distribution of Gal3ST-2 in sh-GM130 cells is quite similar to that of sh-control cells. **D-F**, show cells at higher magnification. Hoechst 33342 (blue) was used for nuclear staining. Bars A-C: 50  $\mu\text{m}$  and D-F: 10  $\mu\text{m}$ .

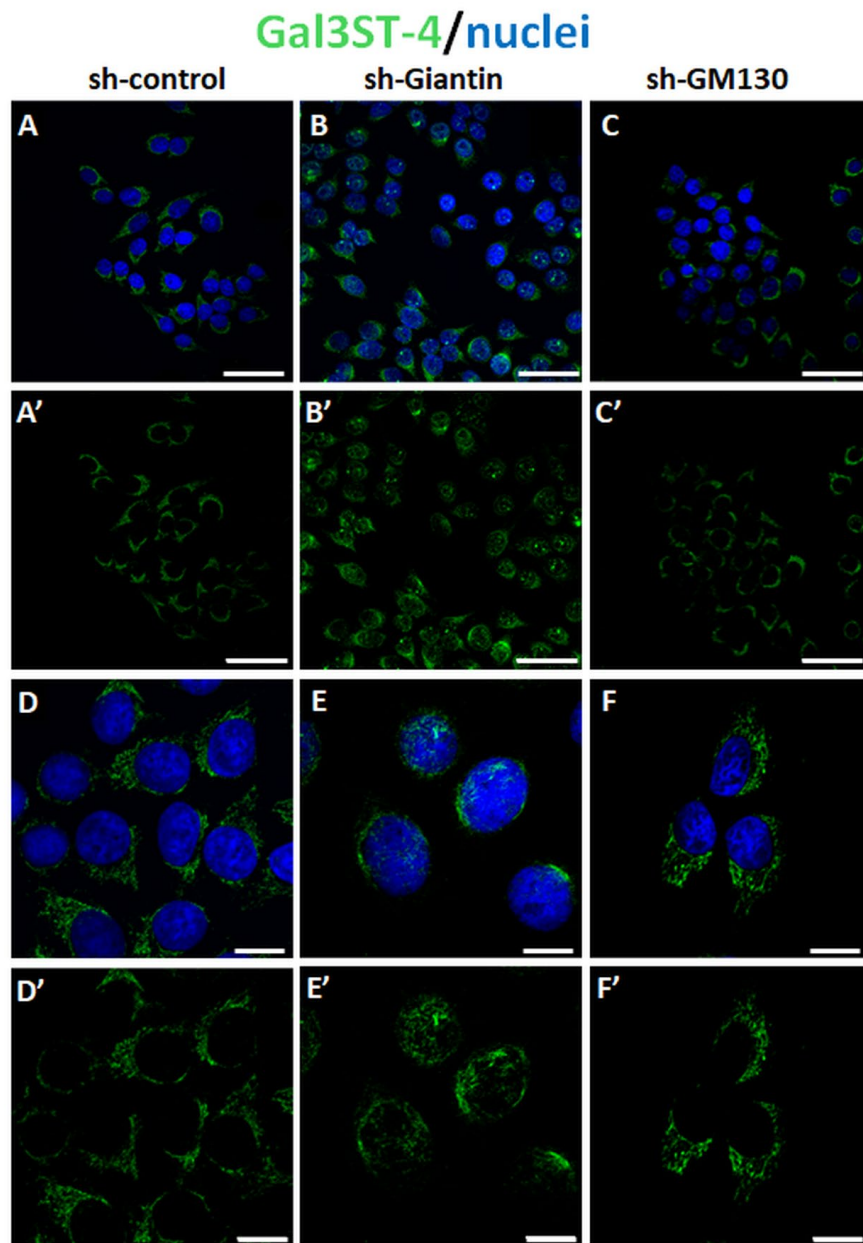

**Supplemental Figure S6. Altered Gal3ST-4 localization in sh-Giantin cells.** Representative micrographs of Gal3ST-4 (green) staining and nuclei (blue) in HSG cells. **A**, In most sh-control cells, Gal3ST-4 is located adjacent to the nucleus in a “crescent moon shaped” distribution; in a smaller percentage of cells, it is also located adjacent to the nucleus, although in a ring-shaped distribution. **B**, In sh-Giantin cells, this adjacent location is maintained, although a mark is also observed, apparently, “on the nucleus.” **C**, The distribution of Gal3ST-4 in sh-GM130 cells is quite similar to that of sh-control cells. **D-F**, show cells at higher magnification. Hoechst 33342 (blue) was used for nuclear staining. Bars A-C: 50  $\mu$ m and D-F: 10  $\mu$ m.

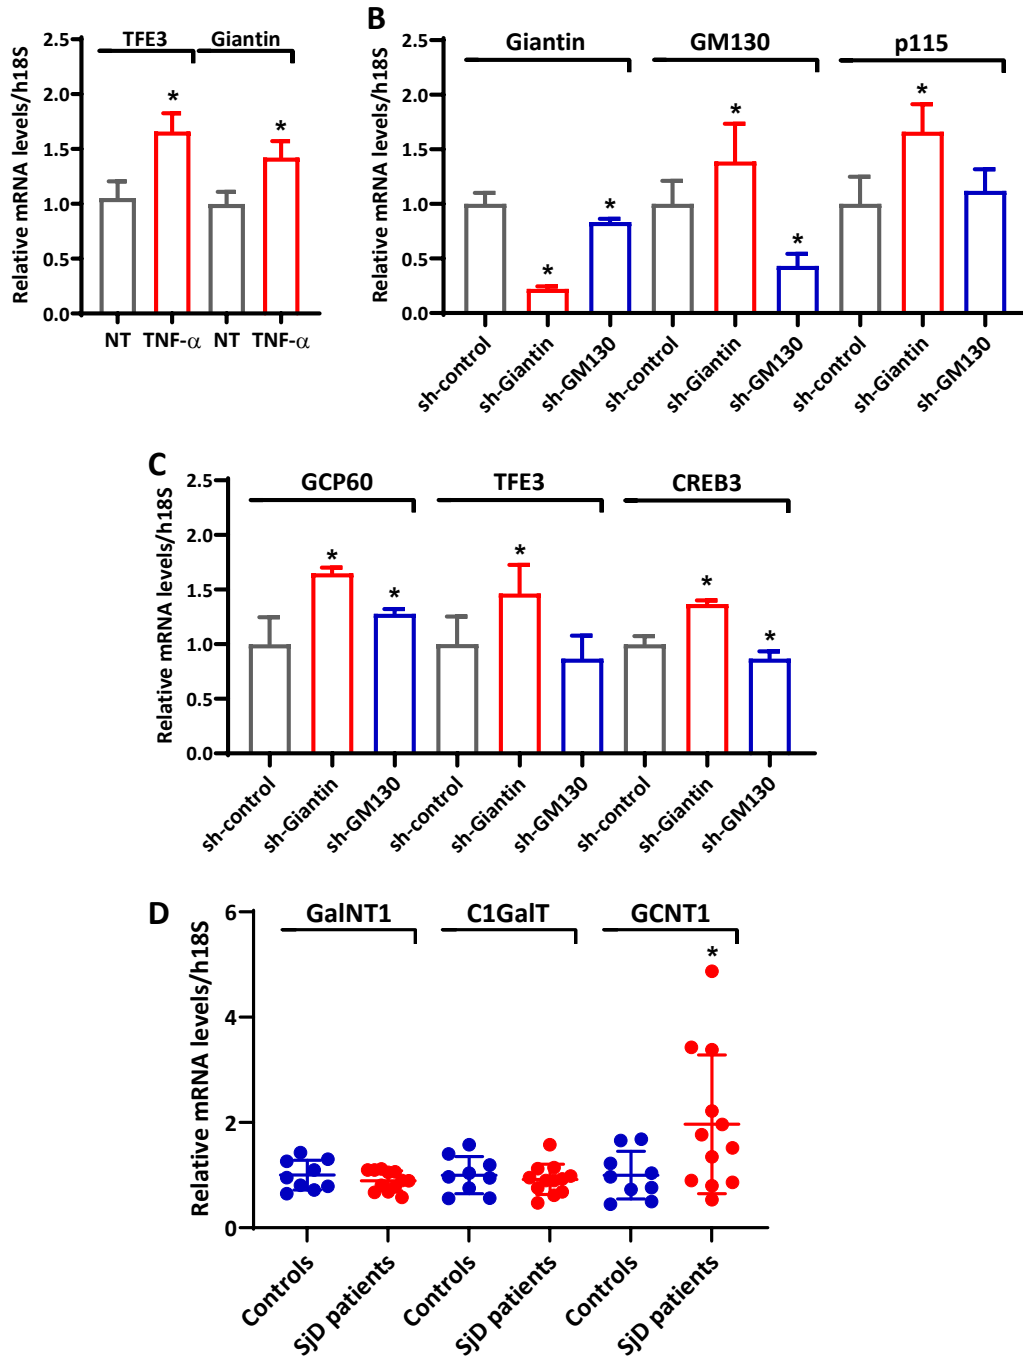

**Supplemental Figure S7. Increased mRNA levels of key components of the Golgi stress response.** **A**, Relative TFE3 and Giantin mRNA levels in non-treated (NT) HSG cells and HSG cells stimulated with 10 ng/mL TNF- $\alpha$  for 24 h. **B-C**, Relative mRNA levels of Giantin, GM130, p115, GCP60, TFE3, and CREB3 in sh-control, sh-Giantin, and sh-GM130 cells. **D**, Relative GalNT1, C1GalT, and GCNT1 mRNA levels in LSG from controls and SjD patients. h18S was used as a housekeeping gene. (\*) p values  $\leq 0.05$  were considered significant.

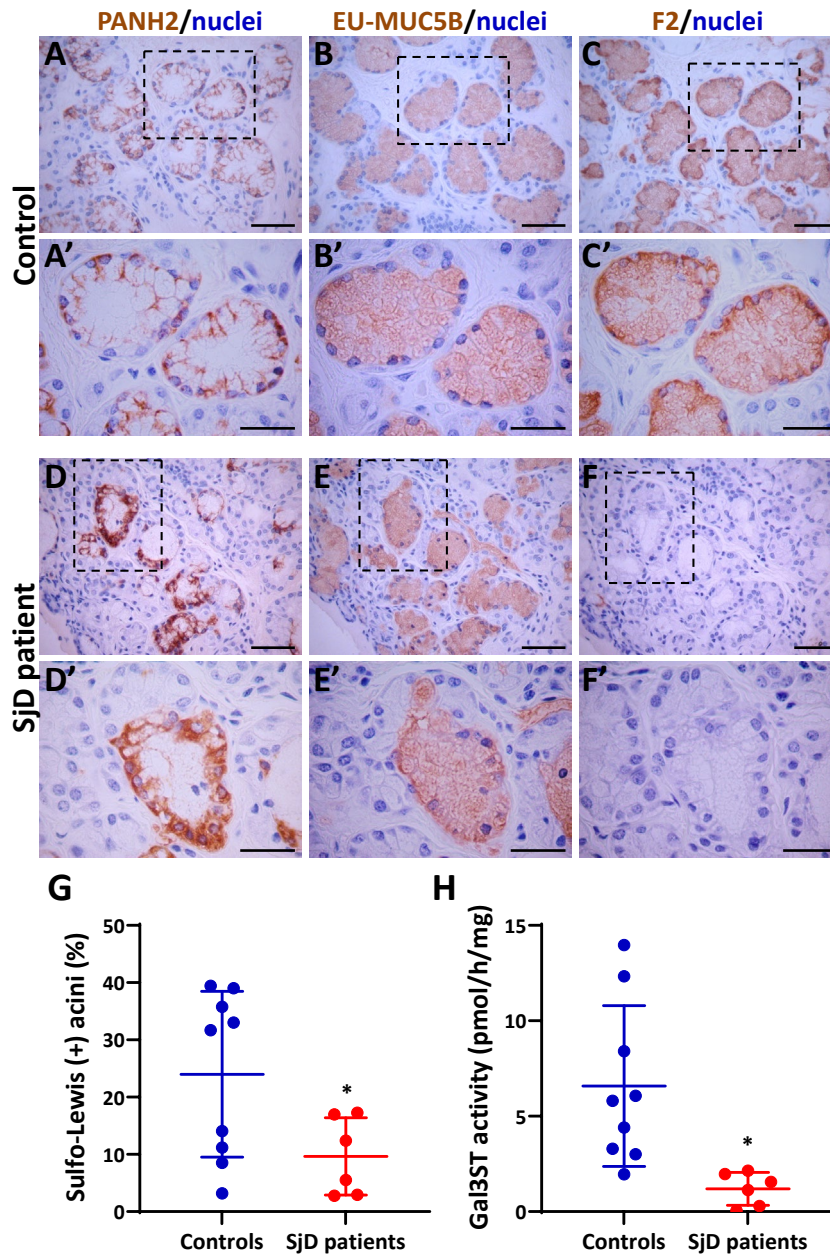

**Supplemental Figure S8. Decreased sulfo-Lewis-positive acini in LSG from SjD patients.** Representative images of immunohistochemical detection of partially glycosylated MUC5B (PANH2) (A and D), the MUC5B polypeptide backbone independent of its glycosylation status (EU-MUC5B) (B and E), and sulfo-Lewis a and c residues (F2) (C and F) in serial sections of LSG from controls (A-C) and SS patients (D-F). A'-F' higher magnifications of the acini surrounded by black dashed lines in A-F. Bars A-F: 100  $\mu$ m and A'-F': 50  $\mu$ m. **G**, Percentage of sulfo-Lewis a and c (F2)-positive acini in LSG from controls and SjD patients. **H**, Gal3STs activity levels in LSG from SjD patients and controls were determined in a previous study from our laboratory (Castro et al., 2012, DOI: 10.1093/rheumatology/ker351).

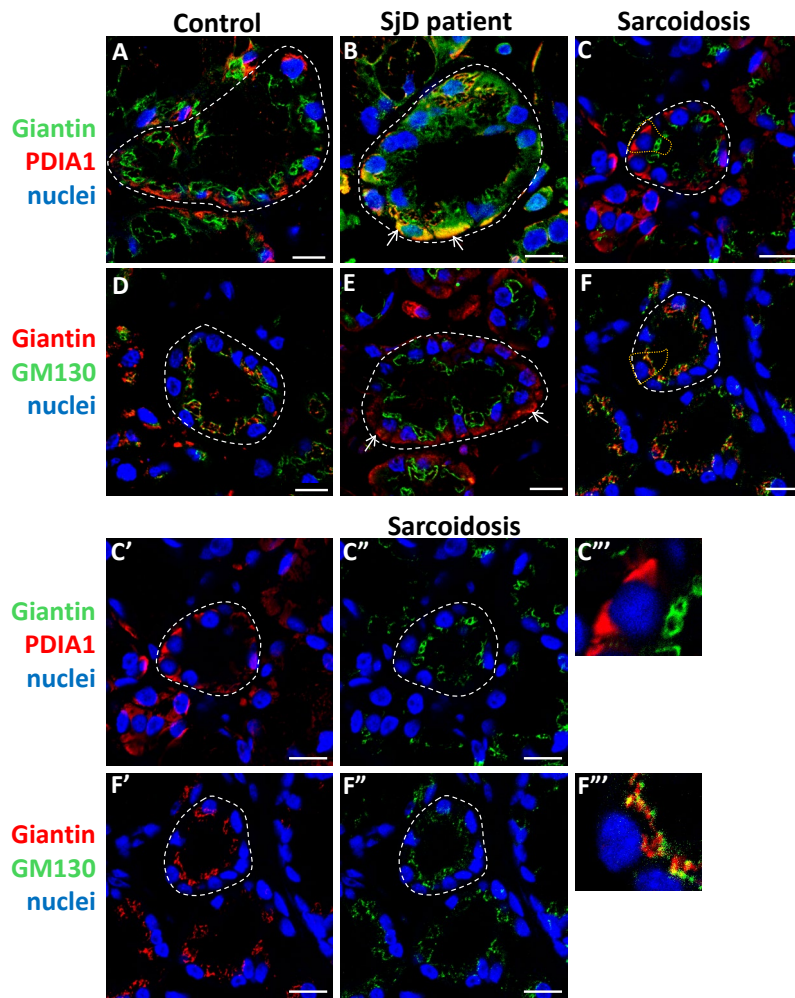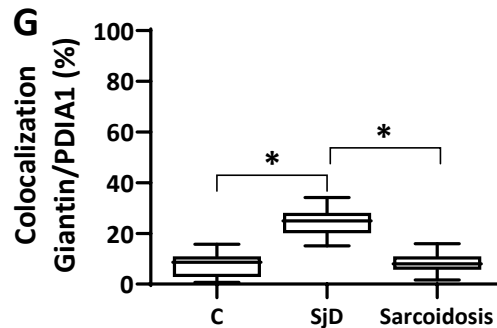

**Supplemental Figure S9. Altered localization of Giantin in LSG from SjD patients, but not in LSG from patients with sarcoidosis.** **A-C**, Representative micrographs of double staining of Giantin (green) and PDIA1 (red) in a LSG section from a control subject (A), a SjD patient (B), and a patient with sarcoidosis (C). **D-F**, Representative micrographs of double staining of Giantin (red) and GM130 (green) in a LSG section from a control subject (D), a SjD patient (E), and a patient with sarcoidosis (F). White arrows show Giantin staining in the basolateral region in SjD patients. Hoechst 33342 (blue) was used for nuclear staining. **C'**, **C''**, **F'**, and **F''** show the green and red channels separately. **C'''** and **F'''** are higher magnifications of the acinar cell surrounded by yellow dashed lines in C and F. The white dashed lines surround the acinar boundaries. L: lumen and bars: 10  $\mu$ m. **G**. Box plot showing the colocalization analysis of Giantin and PDIA1 in acini from LSG sections of 5 controls, 5 SjD patients, and 5 patients with sarcoidosis. Boxes represent the 25th to 75th percentiles; the lines within the boxes represent the median; and the whiskers represent the minimum and maximum. (\*) p values < 0.05 were considered significant using the Mann-Whitney test.
